# Supplementary material for: Psychometric Properties of the Caring Behaviors Inventory-16 in Ethiopia
Source: MDPI journal article supplement (doi:10.3390/nursrep12020037), 2022-05-26
Supplement: s1 [file s1]

## Supplementary Material

**Table S1.** Items and responses of the CBI-16: Original vs Ethiopian Amharic version

| <b>The Caring Behaviors Inventory-16</b><br><b>የነርስ እንክብካቤ ባህሪያት መጠይቅ-16</b>                                                                                                                                                                                                                                                           |                               |                         |                    |                                |                |
|----------------------------------------------------------------------------------------------------------------------------------------------------------------------------------------------------------------------------------------------------------------------------------------------------------------------------------------|-------------------------------|-------------------------|--------------------|--------------------------------|----------------|
| <b>Directions:</b> Please read the list of items that describe nurse caring. For each item, please <i>circle</i> the respondent's response.<br><b>መመሪያ:</b> እባክዎ የተዘረዘሩትን የነርስ እንክብካቤ መገለጫዎች በጥምና ያንብቡ። ለእያንዳንዱ ጥያቄ ታካሚዎች የሚሰጡትን ምላሽ ያክብቡ።<br><b>Remember:</b> You collect data from patients.<br><b>ያስታውሱ:</b> መረጃ የሚሰበሰቡት ከታካሚዎች ነው። |                               |                         |                    |                                |                |
| 1. Attentively listening to you.                                                                                                                                                                                                                                                                                                       |                               |                         |                    |                                |                |
| 1. ነርሷ/ነርሱ በጥምና ያዳምጡዎታል?                                                                                                                                                                                                                                                                                                               |                               |                         |                    |                                |                |
| Never<br>በጭራሽ                                                                                                                                                                                                                                                                                                                          | Almost never<br>ብዙ አያዳምጡም     | Occasionally<br>አልፎ አልፎ | Usually<br>ብዙውን ጊዜ | Almost always<br>ሁልጊዜ ማለት ይቻላል | Always<br>ሁልጊዜ |
| 2. Giving instructions or teaching you.                                                                                                                                                                                                                                                                                                |                               |                         |                    |                                |                |
| 2. ነርሷ/ነርሱ መመሪያ ወይም ትምህርት ይሰጡዎታል?                                                                                                                                                                                                                                                                                                      |                               |                         |                    |                                |                |
| Never<br>በጭራሽ                                                                                                                                                                                                                                                                                                                          | Almost never<br>ብዙ አይሰጡም      | Occasionally<br>አልፎ አልፎ | Usually<br>ብዙውን ጊዜ | Almost always<br>ሁልጊዜ ማለት ይቻላል | ሁልጊዜ           |
| 3. Treating you as an individual.                                                                                                                                                                                                                                                                                                      |                               |                         |                    |                                |                |
| 3. ነርሷ/ነርሱ እንደሰው የሚገባዎን እንክብካቤ ይሰጡዎታል?                                                                                                                                                                                                                                                                                                 |                               |                         |                    |                                |                |
| Never<br>በጭራሽ                                                                                                                                                                                                                                                                                                                          | Almost never<br>ብዙ አይደሉም      | Occasionally<br>አልፎ አልፎ | Usually<br>ብዙውን ጊዜ | Almost always<br>ሁልጊዜ ማለት ይቻላል | ሁልጊዜ           |
| 4. Spending time with you.                                                                                                                                                                                                                                                                                                             |                               |                         |                    |                                |                |
| 4. ነርሷ/ነርሱ ከእርስዎ ጋር በቂ ጊዜ ያሳልፋሉ?                                                                                                                                                                                                                                                                                                       |                               |                         |                    |                                |                |
| Never<br>በጭራሽ                                                                                                                                                                                                                                                                                                                          | Almost never<br>በቂ ጊዜ አያሳልፉም  | Occasionally<br>አልፎ አልፎ | Usually<br>ብዙውን ጊዜ | ሁልጊዜ ማለት ይቻላል                  | ሁልጊዜ           |
| 5. Supporting you.                                                                                                                                                                                                                                                                                                                     |                               |                         |                    |                                |                |
| 5. ነርሷ/ነርሱ አስፈላጊውን የህክምና ድጋፍ ያደርጉልዎታል?                                                                                                                                                                                                                                                                                                 |                               |                         |                    |                                |                |
| Never<br>በጭራሽ                                                                                                                                                                                                                                                                                                                          | Almost never<br>ብዙ ድጋፍ አያደርጉም | Occasionally<br>አልፎ አልፎ | Usually<br>ብዙውን ጊዜ | ሁልጊዜ ማለት ይቻላል                  | ሁልጊዜ           |
| 6. Being empathetic or identifying with you.                                                                                                                                                                                                                                                                                           |                               |                         |                    |                                |                |
| 6. ነርሷ/ነርሱ ሩህሩህ ናቸው፤ እንደእርስዎ ሆነው ስሜትዎንና ችግርዎን ይረዳልዎታል?                                                                                                                                                                                                                                                                                 |                               |                         |                    |                                |                |
| Never<br>በጭራሽ                                                                                                                                                                                                                                                                                                                          | Almost never<br>ብዙ አይደሉም      | Occasionally<br>አልፎ አልፎ | Usually<br>ብዙውን ጊዜ | ሁልጊዜ ማለት ይቻላል                  | ሁልጊዜ           |
| 7. Being confident with you.                                                                                                                                                                                                                                                                                                           |                               |                         |                    |                                |                |
| 7. ነርሷ/ነርሱ በእርስዎ ላይ እምነት አላቸው።                                                                                                                                                                                                                                                                                                         |                               |                         |                    |                                |                |
| Never<br>በጭራሽ                                                                                                                                                                                                                                                                                                                          | Almost never<br>ብዙ የላቸውም      | Occasionally<br>አልፎ አልፎ | Usually<br>ብዙውን ጊዜ | ሁልጊዜ ማለት ይቻላል                  | ሁልጊዜ           |
| 8. Demonstrating professional knowledge and skill.                                                                                                                                                                                                                                                                                     |                               |                         |                    |                                |                |
| 8. ነርሷ/ነርሱ ሙያዊ ዕውቀትና ክህሎት ያሳያሉ።                                                                                                                                                                                                                                                                                                        |                               |                         |                    |                                |                |
| Never<br>በጭራሽ                                                                                                                                                                                                                                                                                                                          | Almost never<br>ብዙ ክህሎት አያሳዩም | Occasionally<br>አልፎ አልፎ | Usually<br>ብዙውን ጊዜ | ሁልጊዜ ማለት ይቻላል                  | ሁልጊዜ           |
| 9. Including you in planning your care.                                                                                                                                                                                                                                                                                                |                               |                         |                    |                                |                |
| 9. ነርሷ/ነርሱ የሚያስፈልግዎን እንክብካቤ አብረው እንዲያቅዱ ያደርጋሉ።                                                                                                                                                                                                                                                                                         |                               |                         |                    |                                |                |
| Never<br>በጭራሽ                                                                                                                                                                                                                                                                                                                          | Almost never<br>ብዙ አያደርጉም     | Occasionally<br>አልፎ አልፎ | Usually<br>ብዙውን ጊዜ | ሁልጊዜ ማለት ይቻላል                  | ሁልጊዜ           |

|                                                     |                                  |                         |                    |               |      |
|-----------------------------------------------------|----------------------------------|-------------------------|--------------------|---------------|------|
| 10. Treating your information confidentially.       |                                  |                         |                    |               |      |
| 10. ነርሲ/ነርሱ የታካሚዎችን መረጃ በሚስጥር ይይዛሉ።                 |                                  |                         |                    |               |      |
| Never<br>በጭራሽ                                       | Almost never<br>ብዙ ሚስጥር አይዘውም    | Occasionally<br>አልፎ አልፎ | Usually<br>ብዙውን ጊዜ | ሁልጊዜ ማለት ይቻላል | ሁልጊዜ |
| 11. Returning to you voluntarily.                   |                                  |                         |                    |               |      |
| 11. ነርሲ/ነርሱ ወደ እርስዎ በፈቃደኝነት ይመለሳሉ።                  |                                  |                         |                    |               |      |
| Never<br>በጭራሽ                                       | Almost never<br>ብዙ አይመለሱም        | Occasionally<br>አልፎ አልፎ | Usually<br>ብዙውን ጊዜ | ሁልጊዜ ማለት ይቻላል | ሁልጊዜ |
| 12. Talking with you.                               |                                  |                         |                    |               |      |
| 12. ነርሲ/ነርሱ ከእርስዎ ጋር ያወራሉ።                          |                                  |                         |                    |               |      |
| Never<br>በጭራሽ                                       | Almost never<br>ብዙ አያወሩም         | Occasionally<br>አልፎ አልፎ | Usually<br>ብዙውን ጊዜ | ሁልጊዜ ማለት ይቻላል | ሁልጊዜ |
| 13. Meeting your stated and unstated needs.         |                                  |                         |                    |               |      |
| 13. ነርሲ/ነርሱ የተለያዩ ፍላጎቶችን ያሟሉልዎታል።                   |                                  |                         |                    |               |      |
| Never<br>በጭራሽ                                       | Almost never<br>ብዙ አያሟሉልኝም       | Occasionally<br>አልፎ አልፎ | Usually<br>ብዙውን ጊዜ | ሁልጊዜ ማለት ይቻላል | ሁልጊዜ |
| 14. Responding quickly when you call.               |                                  |                         |                    |               |      |
| 14. ነርሲ/ነርሱ ለጥሪዎ በፍጥነት ምላሽ ይሰጣሉ።                    |                                  |                         |                    |               |      |
| Never<br>በጭራሽ                                       | Almost never<br>ብዙ ምላሽ አይሰጡም     | Occasionally<br>አልፎ አልፎ | Usually<br>ብዙውን ጊዜ | ሁልጊዜ ማለት ይቻላል | ሁልጊዜ |
| 15. Giving your treatments and medications on time. |                                  |                         |                    |               |      |
| 15. ነርሲ/ነርሱ መድኃኒቶችና ሌሎች ሕክምናዎችን በስዊቱ ይሰጡዎታል።        |                                  |                         |                    |               |      |
| Never<br>በጭራሽ                                       | Almost never<br>ብዙ ጊዜ ስዊት አይጠብቁም | Occasionally<br>አልፎ አልፎ | Usually<br>ብዙውን ጊዜ | ሁልጊዜ ማለት ይቻላል | ሁልጊዜ |
| 16. Relieving your symptoms.                        |                                  |                         |                    |               |      |
| 16. ነርሲ/ነርሱ የሕመም ምልክቶችን ለማስታገስ ይጥራሉ።                |                                  |                         |                    |               |      |
| Never<br>በጭራሽ                                       | Almost never<br>ብዙ አይጥሩም         | Occasionally<br>አልፎ አልፎ | Usually<br>ብዙውን ጊዜ | ሁልጊዜ ማለት ይቻላል | ሁልጊዜ |

Thanks for your participation!  
ለተሳትፎዎ እናመሰግናለን!
